# Supplementary material for: Isolation and structure determination of a new analog of polycavernosides from marine Okeania sp. cyanobacterium
Source: publisher site journal article supplement (doi:10.3762/bjoc.20.57), 2024-03-21

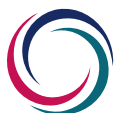

## Supporting Information

for

### Isolation and structure determination of a new analog of polycavernosides from marine *Okeania* sp. cyanobacterium

Kairi Umeda, Naoaki Kurisawa, Ghulam Jeelani, Tomoyoshi Nozaki, Kiyotake Suenaga and Arihiro Iwasaki

*Beilstein J. Org. Chem.* **2024**, *20*, 645–652. doi:10.3762/bjoc.20.57

### NMR data for polycavernoside E (1)

## Table of contents

|                                                                                                                                        |    |
|----------------------------------------------------------------------------------------------------------------------------------------|----|
| Comparison of the carbon chemical shifts between <b>1</b> and <b>5</b> in CDCl <sub>3</sub> (Table S1) .....                           | S2 |
| Comparison of the proton chemical shifts of disaccharide moiety between <b>1</b> and <b>5</b><br>in CDCl <sub>3</sub> (Table S2) ..... | S3 |
| NMR spectra of polycavernoside E ( <b>1</b> ) in CDCl <sub>3</sub> .....                                                               | S4 |
| NMR spectra of polycavernoside E ( <b>1</b> ) in CD <sub>3</sub> OD .....                                                              | S7 |

**Table S1:** Comparison of the carbon chemical shifts between polycavernosides E (**1**) and D**(5)** in CDCl<sub>3</sub>.

| position <sup>1</sup> | polycavernoside E ( <b>1</b> ) <sup>2</sup> | polycavernoside D ( <b>5</b> ) <sup>3</sup> |
|-----------------------|---------------------------------------------|---------------------------------------------|
| 1                     | 171.9, C                                    | 171.5, C                                    |
| 2                     | 35.6, CH <sub>2</sub>                       | 35.5, CH <sub>2</sub>                       |
| 3                     | 82.0, CH                                    | 81.9, CH                                    |
| 4                     | 38.3, C                                     | 38.2, C                                     |
| 5 <sup>4</sup>        | 85.3, CH                                    | 75.1, CH                                    |
| 6                     | 37.7, CH <sub>2</sub>                       | 37.5, CH <sub>2</sub>                       |
| 7                     | 83.8, CH                                    | 85.1, CH                                    |
| 8                     | 42.1, CH <sub>2</sub>                       | 42.0, CH <sub>2</sub>                       |
| 9                     | 206.9, C                                    | 206.5, C                                    |
| 10                    | 103.0, C                                    | 102.6, C                                    |
| 11                    | 39.7, CH                                    | 39.5, CH                                    |
| 12                    | 33.6, CH <sub>2</sub>                       | 33.5, CH <sub>2</sub>                       |
| 13                    | 83.5, CH                                    | 83.3, CH                                    |
| 14                    | 39.8, C                                     | 39.7, C                                     |
| 15                    | 78.4, CH                                    | 78.3, CH                                    |
| 16                    | 127.4, CH                                   | 126.9, CH                                   |
| 17                    | 135.4, CH                                   | 135.5, CH                                   |
| 18                    | 130.1, CH                                   | 129.6, CH                                   |
| 19                    | 133.9, CH                                   | 134.2, CH                                   |
| 20                    | 131.2, CH                                   | 130.2, CH                                   |
| 21                    | 134.6, CH                                   | 136.2, CH                                   |
| 27                    | 13.3, CH <sub>3</sub>                       | 13.7, CH <sub>3</sub>                       |
| 28                    | 17.8, CH <sub>3</sub>                       | 17.6, CH <sub>3</sub>                       |
| 29                    | 19.4, CH <sub>3</sub>                       | 19.2, CH <sub>3</sub>                       |
| 30                    | 22.2, CH <sub>3</sub>                       | 22.0, CH <sub>3</sub>                       |
| 31                    | 13.9, CH <sub>3</sub>                       | 13.7, CH <sub>3</sub>                       |
| 1'                    | 106.1, CH                                   | 106.0, CH                                   |
| 2'                    | 83.8, CH                                    | 83.7, CH                                    |
| 3'                    | 79.9, CH                                    | 79.9, CH                                    |
| 4'                    | 78.5, CH                                    | 78.4, CH                                    |
| 5'                    | 63.2, CH <sub>2</sub>                       | 63.1, CH <sub>2</sub>                       |
| 6'                    | 61.1, CH <sub>3</sub>                       | 60.9, CH <sub>3</sub>                       |
| 7'                    | 58.8, CH <sub>3</sub>                       | 58.6, CH <sub>3</sub>                       |
| 1''                   | 103.0, CH                                   | 102.9, CH                                   |
| 2''                   | 71.7, CH                                    | 71.6, CH                                    |
| 3''                   | 71.0, CH                                    | 71.0, CH                                    |
| 4''                   | 78.7, CH                                    | 78.7, CH                                    |
| 5''                   | 60.1, CH <sub>2</sub>                       | 60.0, CH <sub>2</sub>                       |
| 6''                   | 58.1, CH <sub>3</sub>                       | 58.0, CH <sub>3</sub>                       |

<sup>1</sup> The data from C-22 to C-26 were not included as they were useless for the discussion the relative configuration.

<sup>2</sup> Measured at 100 MHz.

<sup>3</sup> Measured at 151 MHz. Navarro, G.; Cummings, M. E.; Lee, J.; Moss, N.; Glukhov, E.; Valeriote, F. A.; Gerwick, L.; Gerwick, W. H. *Environ. Sci. Technol. Lett.* **2015**, *2*, 166-170.

<sup>4</sup> The chemical shift difference was big possibly due to the misassignment of the C-5 carbon chemical shift of **5**.

**Table S2:** Comparison of the proton chemical shifts of disaccharide moiety between **1** and **5**

in CDCl<sub>3</sub>.

| position | polycavernoside E ( <b>1</b> ) <sup>1</sup> | polycavernoside D ( <b>5</b> ) <sup>2</sup> |
|----------|---------------------------------------------|---------------------------------------------|
| 1'       | 4.27, CH                                    | 4.27, CH                                    |
| 2'       | 3.07, CH <sub>2</sub>                       | 3.08, CH <sub>2</sub>                       |
| 3'       | 3.64, CH                                    | 3.64, CH                                    |
| 4'       | 3.27, CH                                    | 3.27, CH                                    |
| 5a'      | 4.03, CH <sub>2</sub>                       | 4.03, CH <sub>2</sub>                       |
| 5b'      | 3.12                                        | 3.12                                        |
| 6'       | 3.61, CH <sub>3</sub>                       | 3.61, CH <sub>3</sub>                       |
| 7'       | 3.45, CH <sub>3</sub>                       | 3.45, CH <sub>3</sub>                       |
| 1''      | 4.87, CH                                    | 4.86, CH                                    |
| 2''      | 3.53, CH                                    | 3.52, CH                                    |
| 3''      | 3.75, CH                                    | 3.74, CH                                    |
| 4''      | 3.34, CH                                    | 3.35, CH                                    |
| 5a''     | 4.23, CH <sub>2</sub>                       | 4.23, CH <sub>2</sub>                       |
| 5b''     | 3.46                                        | 3.46                                        |
| 6''      | 3.48, CH <sub>3</sub>                       | 3.48, CH <sub>3</sub>                       |

<sup>1</sup> Measured at 400 MHz.

<sup>2</sup> Measured at 600 MHz. Navarro, G.; Cummings, M. E.; Lee, J.; Moss, N.; Glukhov, E.; Valeriote, F. A.; Gerwick, L.; Gerwick, W. H. *Environ. Sci. Technol. Lett.* **2015**, *2*, 166-170.

$^1\text{H}$  NMR (400 MHz,  $\text{CDCl}_3$ ) spectrum of polycavernoside E (**1**)

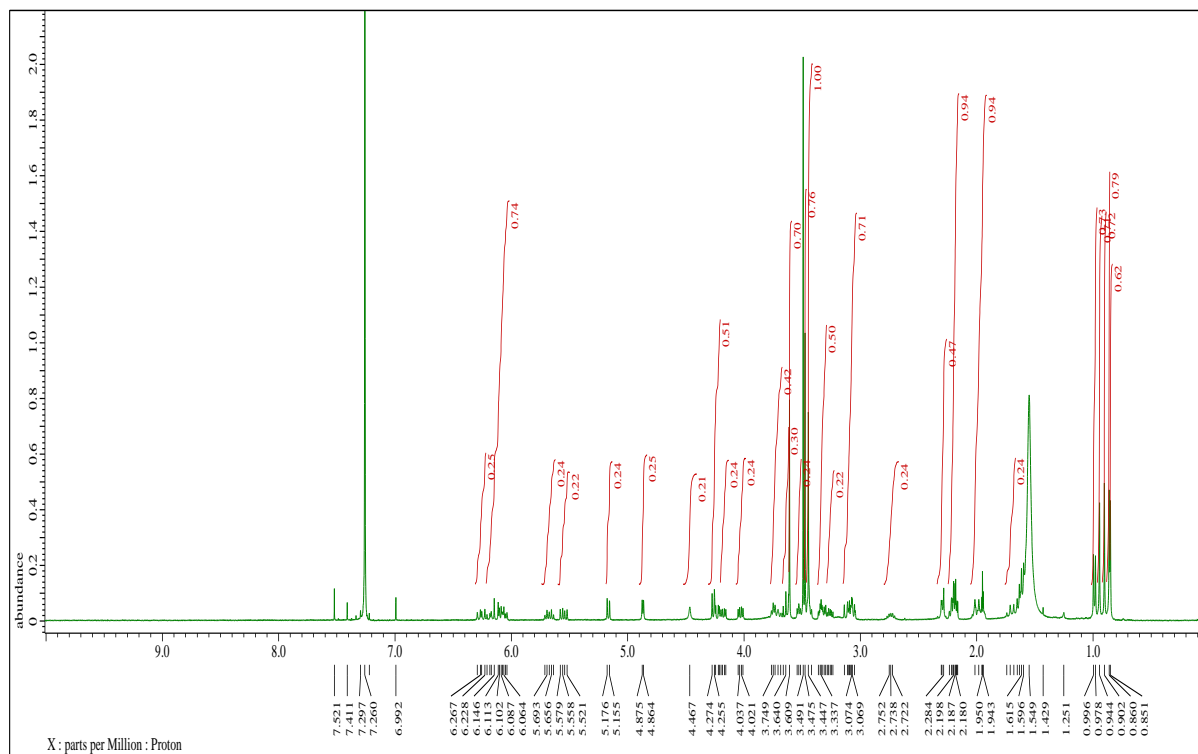

$^{13}\text{C}\{^1\text{H}\}$  NMR (100 MHz,  $\text{CDCl}_3$ ) spectrum of polycavernoside E (**1**)

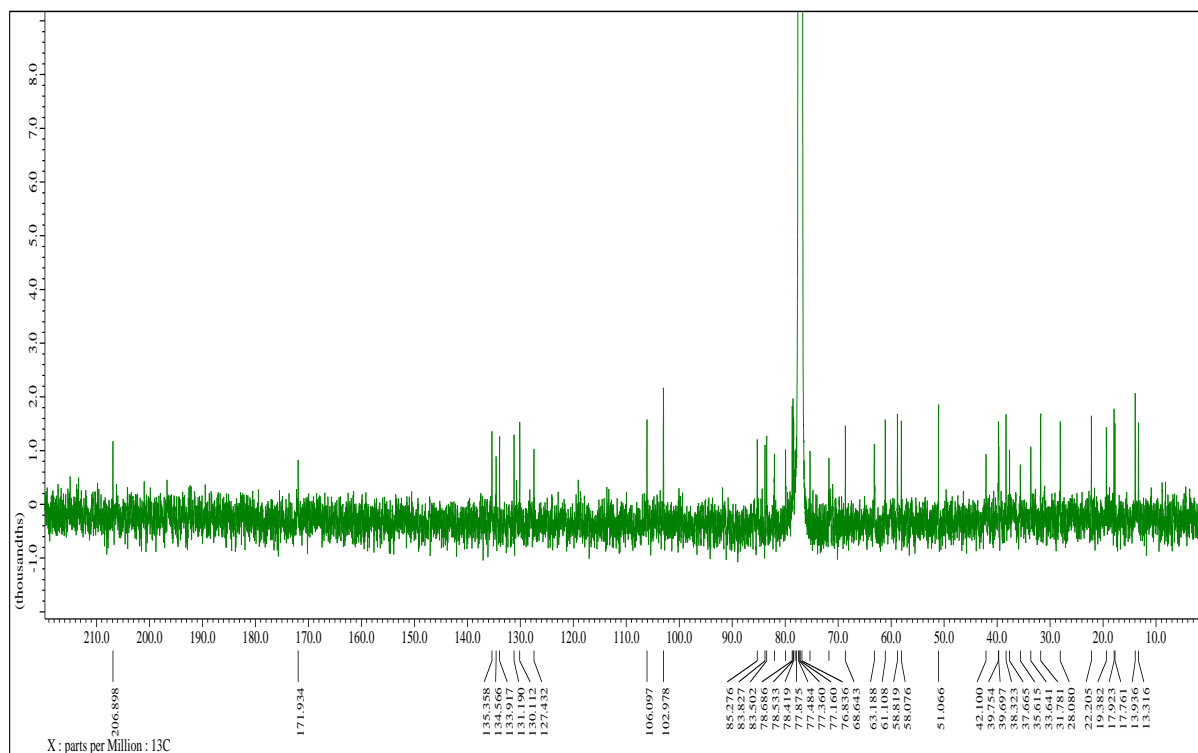

COSY (400 MHz, CDCl<sub>3</sub>) spectrum of polycavernoside E (**1**)

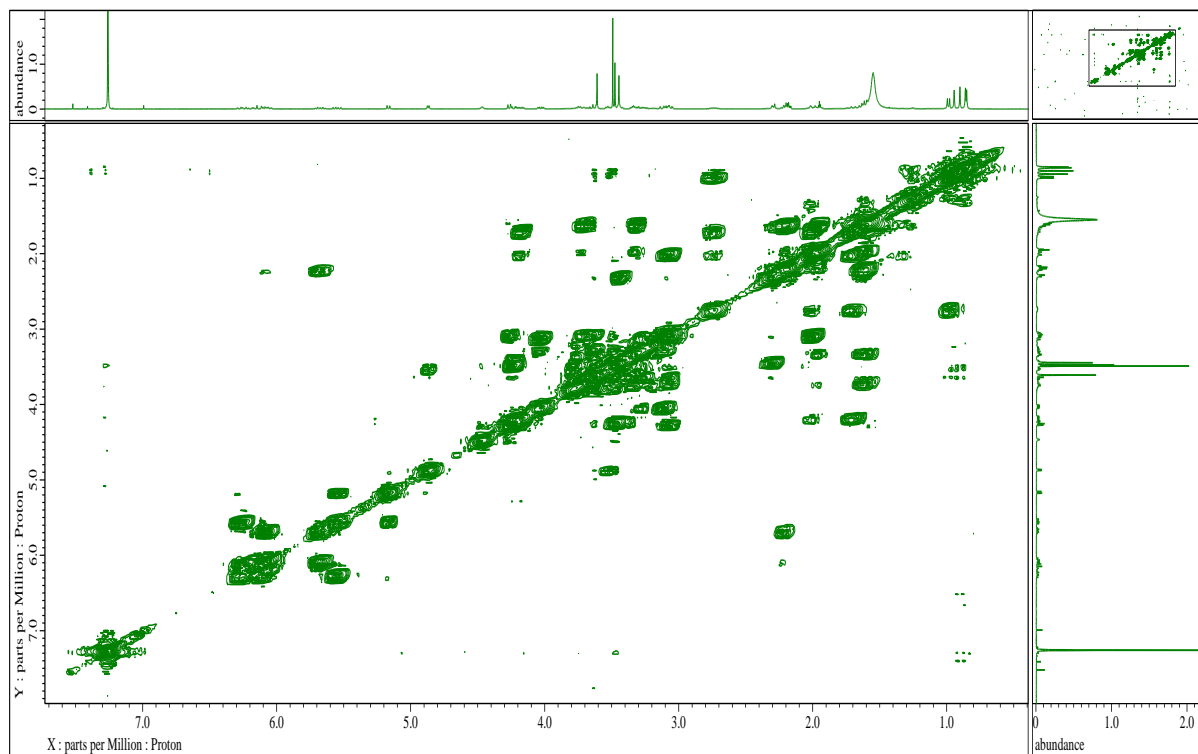

HMQC (400 MHz, CDCl<sub>3</sub>) spectrum of polycavernoside E (**1**)

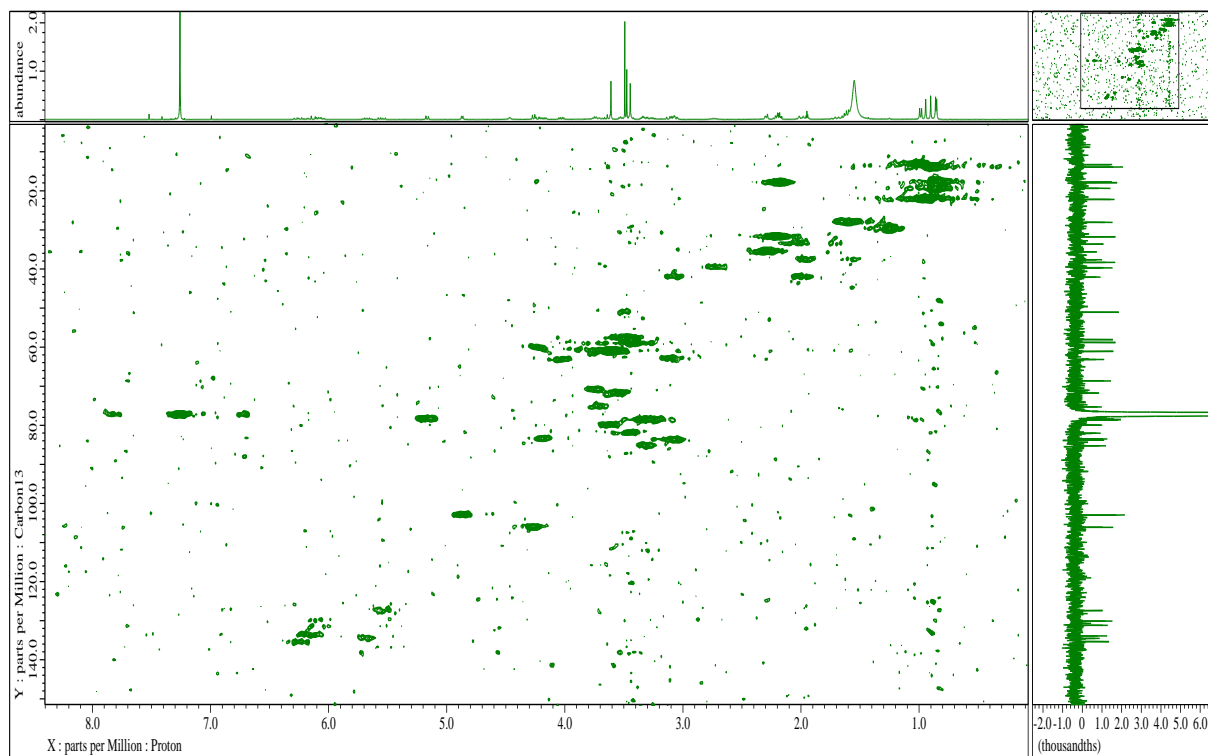

HMBC (400 MHz, CDCl<sub>3</sub>) spectrum of polycavernoside E (**1**)

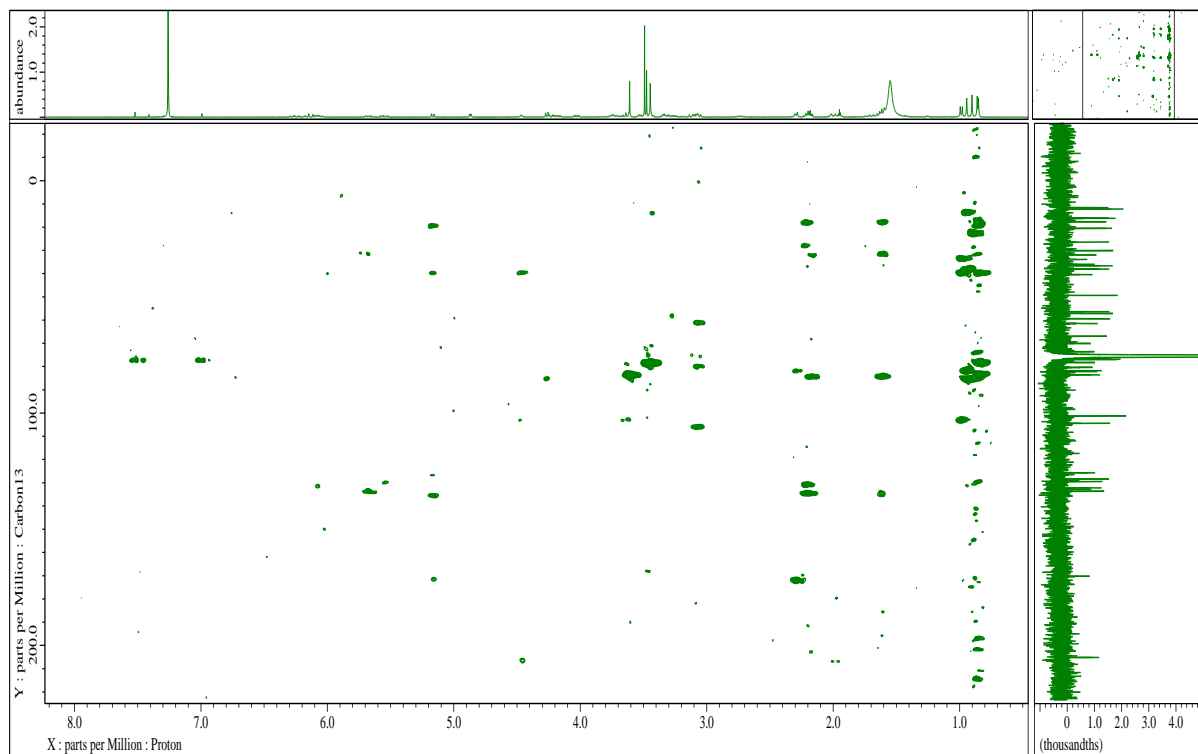

NOESY (400 MHz, CDCl<sub>3</sub>) spectrum of polycavernoside E (**1**)

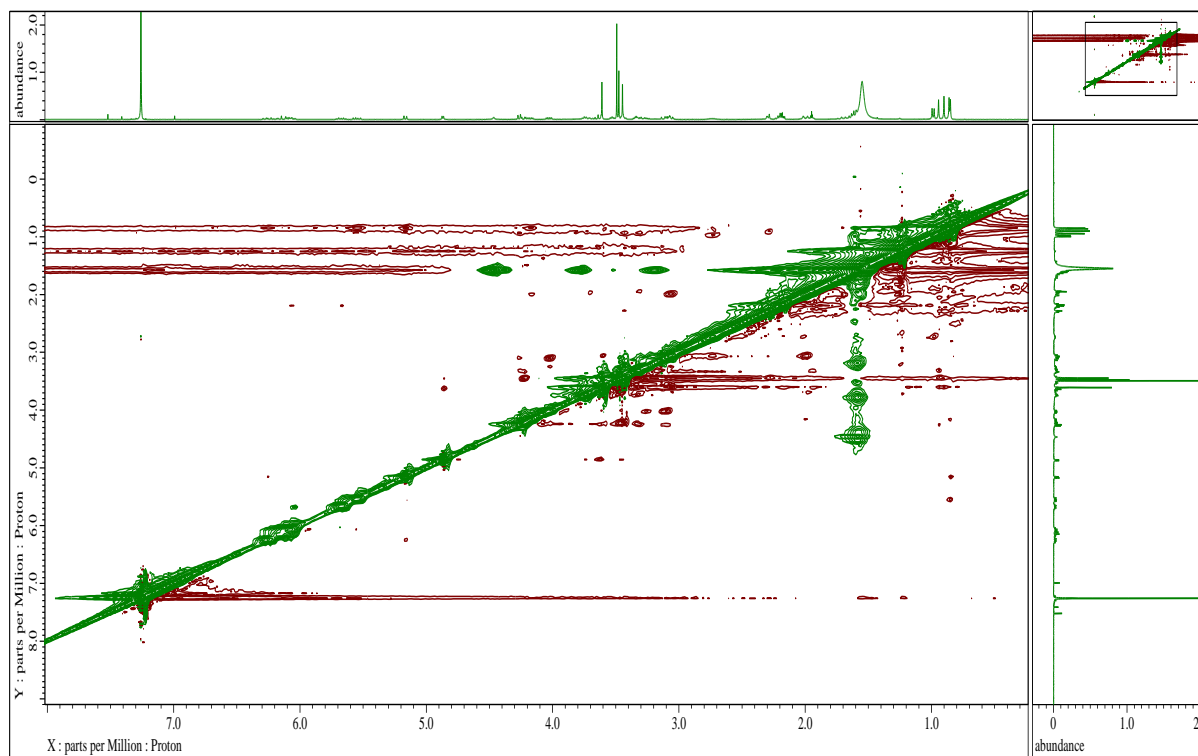

$^1\text{H}$  NMR (400 MHz,  $\text{CD}_3\text{OD}$ ) spectrum of polycavernoside E (1)

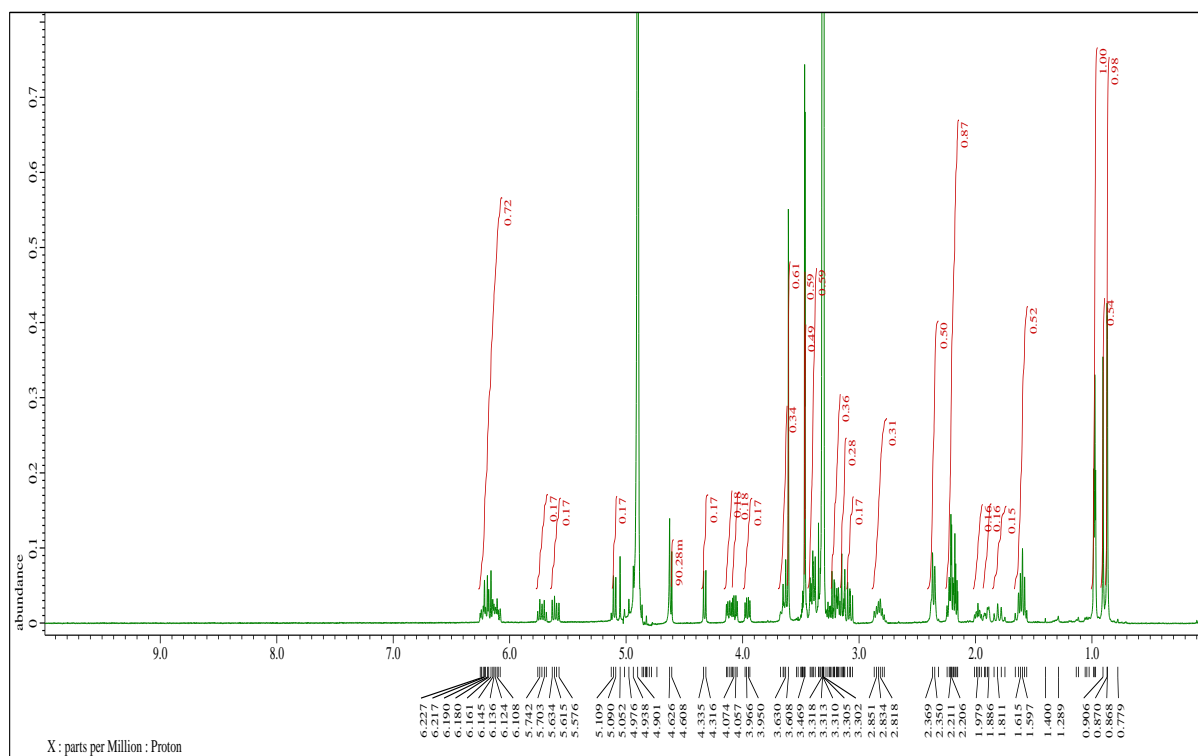

$^{13}\text{C}\{^1\text{H}\}$  NMR (100 MHz,  $\text{CD}_3\text{OD}$ ) spectrum of polycavernoside E (1)

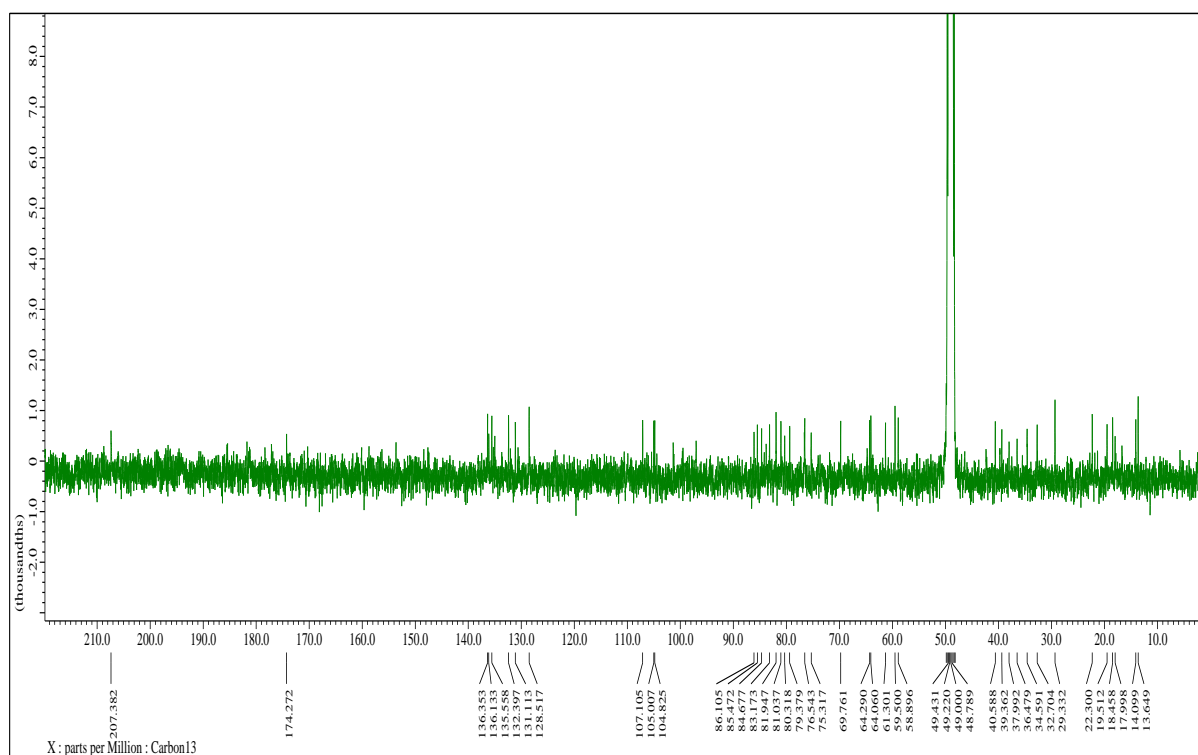



COSY (400 MHz, CD<sub>3</sub>OD) spectrum of polycavernoside E (1)

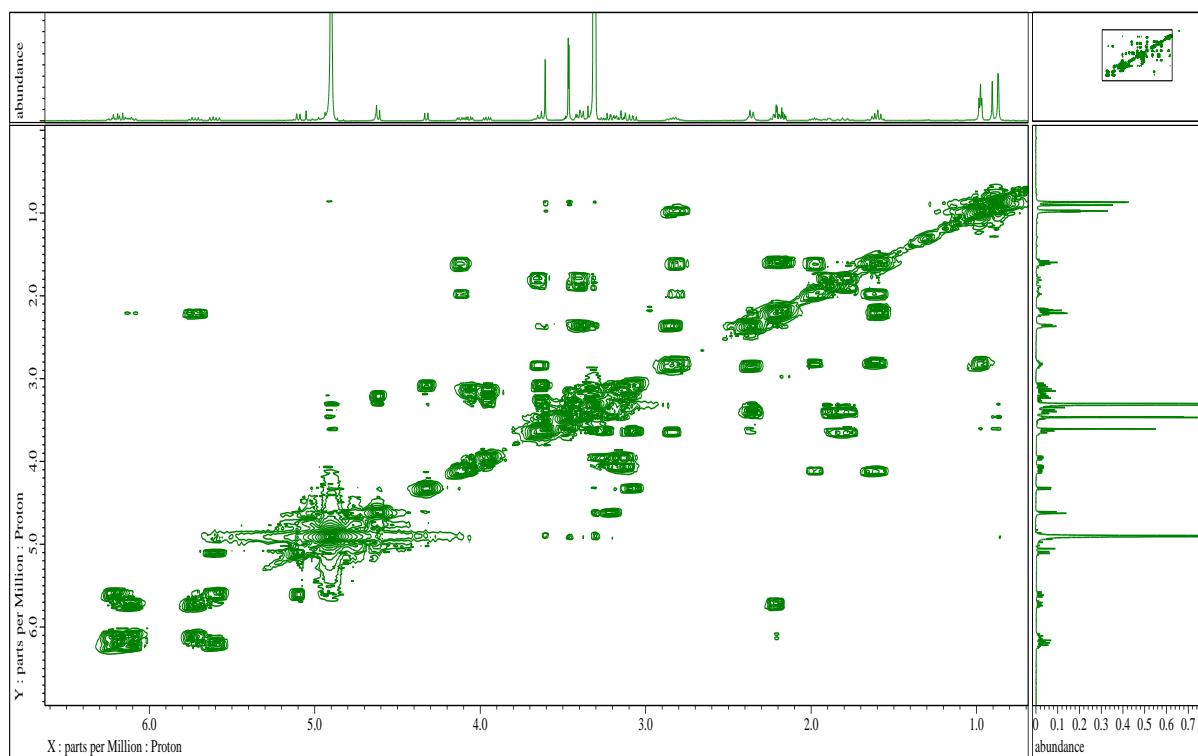

HMQC (400 MHz, CD<sub>3</sub>OD) spectrum of polycavernoside E (1)

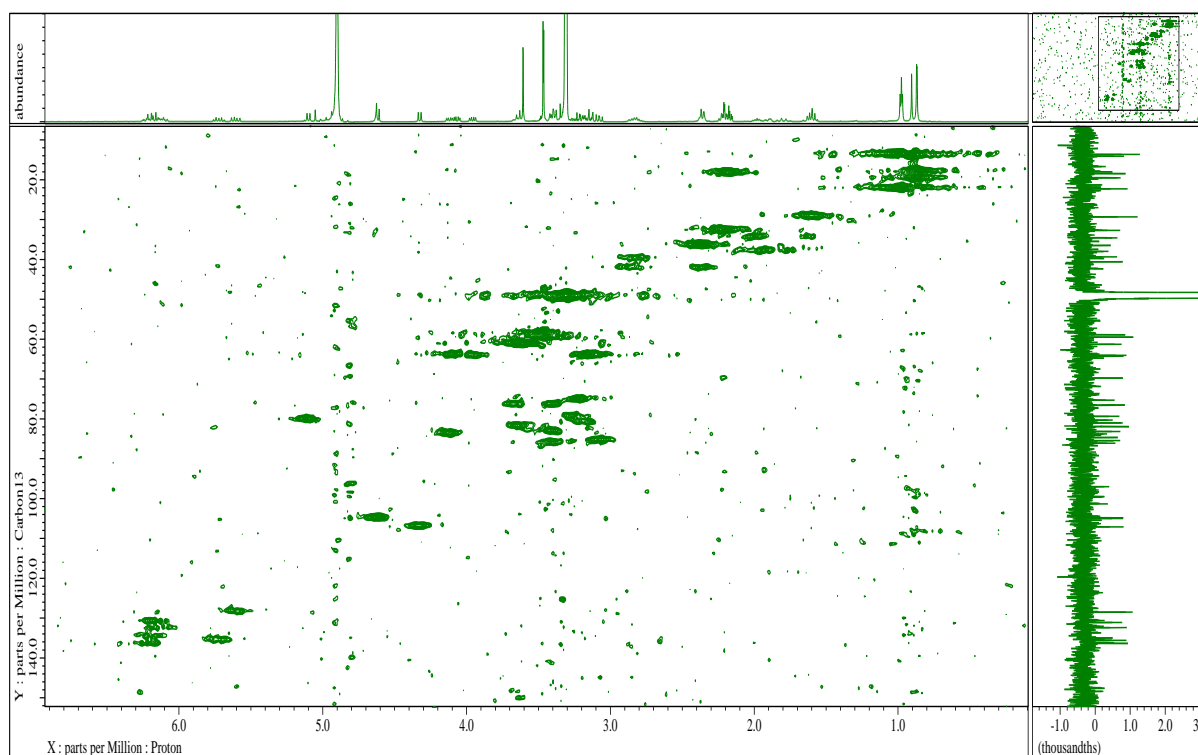

HMBC (400 MHz, CD<sub>3</sub>OD) spectrum of polycavernoside E (**1**)

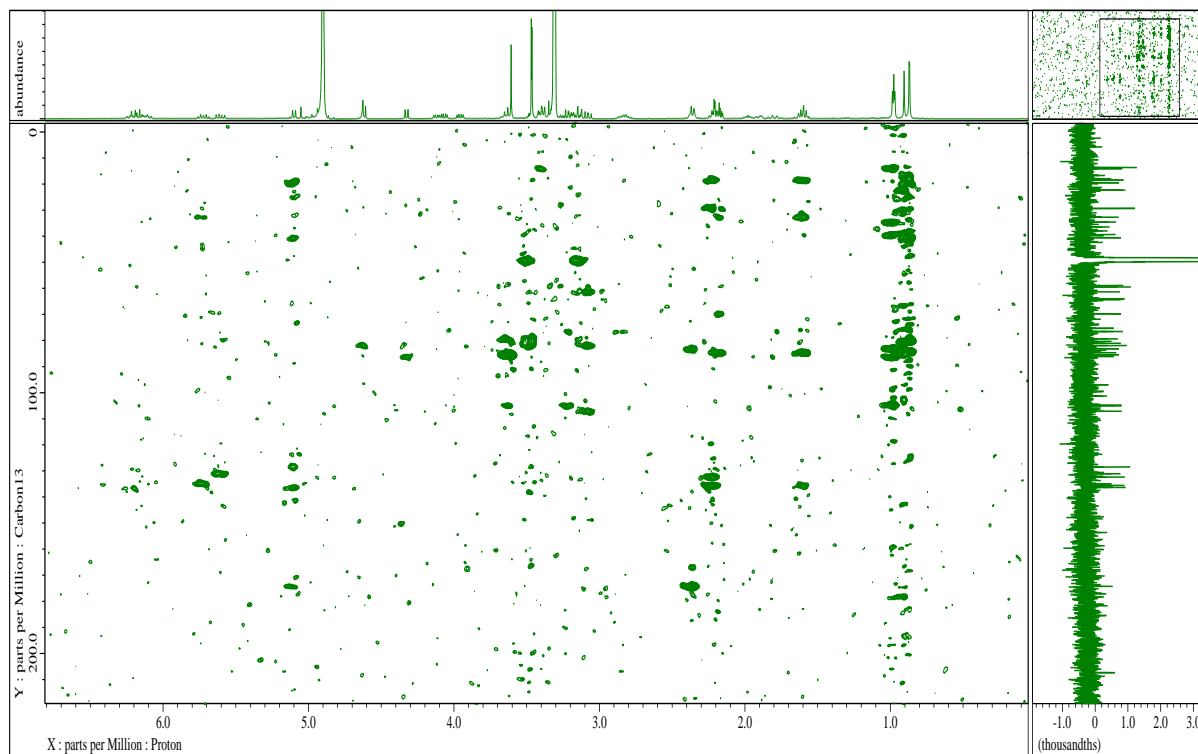

NOESY (400 MHz, CD<sub>3</sub>OD) spectrum of polycavernoside E (**1**)

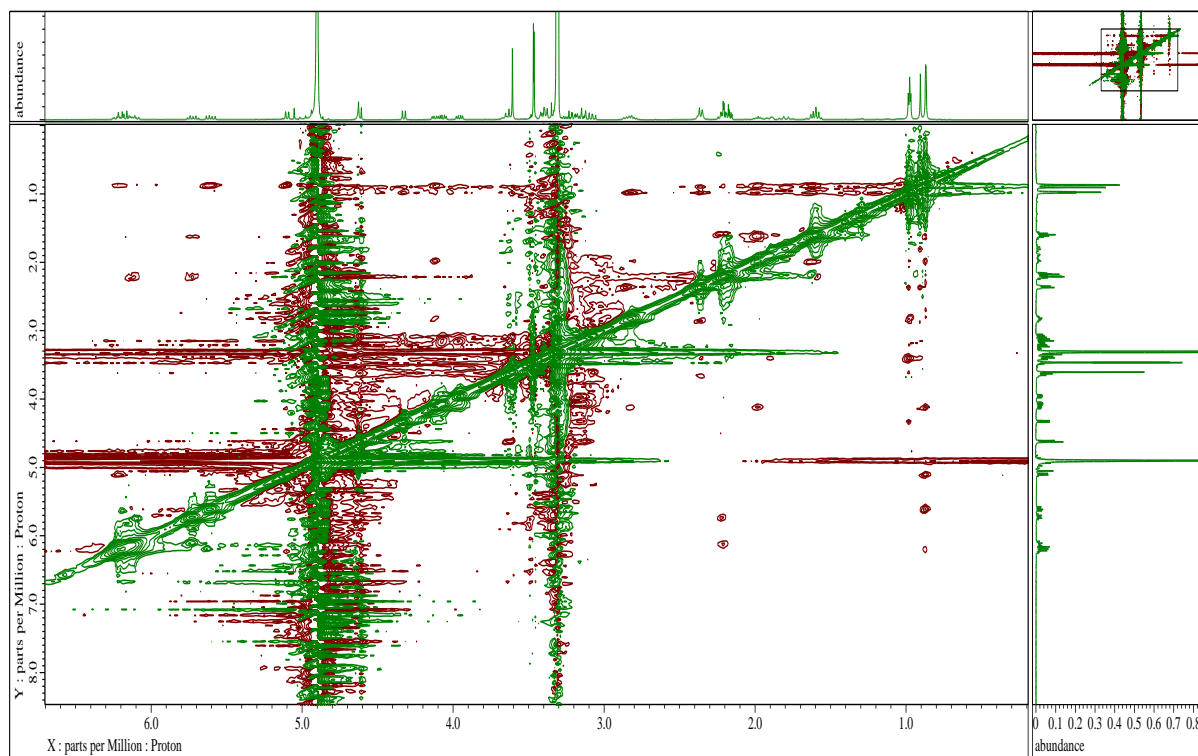

Supplement: Additional file 1 [file 1860-5397-20-57-S1.pdf]
